# Supplementary material for: Does bile exposure during surgery affect the postoperative recovery and complications of pediatric patients with choledochal cysts treated by laparoscopic surgery?
Source: Research Square preprint supplement (doi:10.21203/rs.3.rs-4720675/v1), 2024-08-06
Supplement: Supplementary file 1 [file 56c0dc00eb85f14b9192ace5.docx]

**Table 3. Postoperative complications during hospitalization**

|  | **Control group** | **BE group** | ***p-*value** |
| --- | --- | --- | --- |
| **Total number of patients** | 29 | 11 |  |
| **Biliary leakage (n, %)** | 3 (10.3%) | 0 | 0.55 |
| **Cholangitis (n, %)** | 0 | 0 |  |
| **Pancreatic fistula (n, %)** | 0 | 0 |  |
| **Wound infection (n, %)** | 0 | 0 |  |
| **Reoperation (n, %)** | 1 (3.4%) | 0 | 1.00 |

***BE* bile exposure**
