# Supplementary material for: Does bile exposure during surgery affect the postoperative recovery and complications of pediatric patients with choledochal cysts treated by laparoscopic surgery?
Source: Research Square preprint supplement (doi:10.21203/rs.3.rs-4720675/v1), 2024-08-06
Supplement: Supplementary file 2 [file 63cba42c5e519796e55007c6.docx]

**Table 4. Late postoperative complications**

|  | **Control group** | **BE group** | ***p-*value** |
| --- | --- | --- | --- |
| **Total number of patients** | 29 | 11 |  |
| **Follow-up period (months)** | 51.0 ± 25.2 | 60.7 ± 26.7 | 0.29 |
| **Stenosis of anastomotic site (n, %)** | 3 (10.3%) | 2 (18.2%) | 0.60 |
| **Intrahepatic stone formation (n, %)** | 0 | 1 (9.1%) | 0.28 |
| **Cholangitis (n, %)** | 2 (6.9%) | 4 (36.4%) | 0.03 |
| **Ileus (n, %)** | 0 | 0 |  |

***BE* bile exposure**
