# Supplementary material for: Does bile exposure during surgery affect the postoperative recovery and complications of pediatric patients with choledochal cysts treated by laparoscopic surgery?
Source: Research Square preprint supplement (doi:10.21203/rs.3.rs-4720675/v1), 2024-08-06
Supplement: Supplementary file 3 [file a28f2915acc58f9e6b4dd4de.docx]

**Table 2. Comparison of operative results and perioperative complications**

|  | **Control group** | **BE group** | ***p-*value** |
| --- | --- | --- | --- |
| **Total number of patients** | 29 | 11 |  |
| **Operative time (min)** | 539.7 ± 100.9 | 516.5 ± 81.4 | 0.60 |
| **Blood loss volume (ml)** | 86.1 ± 112.1 | 48.0 ± 68.3 | 0.30 |
| **Time taken to the initiation of water intake (POD)** | 4.1 ± 1.6 | 4.0 ± 1.5 | 0.90 |
| **Time taken to the initiation of meal intake (POD)** | 5.5 ± 1.8 | 5.1 ± 1.6 | 0.46 |
| **Time taken to the removal of the drain tube (POD)** | 9.7 ± 7.6 | 7.2 ± 3.4 | 0.30 |
| **Length of hospital stay (days)** | 15.6 ± 9.8 | 13.2 ± 5.5 | 0.46 |

***BE* bile exposure, *POD* postoperative day**
