# Supplementary material for: Does bile exposure during surgery affect the postoperative recovery and complications of pediatric patients with choledochal cysts treated by laparoscopic surgery?
Source: Research Square preprint supplement (doi:10.21203/rs.3.rs-4720675/v1), 2024-08-06
Supplement: Supplementary file 4 [file f0e0f61dfec1b7934bf033f9.docx]

**Table 1. Patient background characteristics**

|  | **Control group** | **BE group** | ***p-*value** |
| --- | --- | --- | --- |
| **Total number of patients** | 29 | 11 |  |
| **Age (months old)** | 83.0 ± 77.0 | 68.1 ± 83.0 | 0.60 |
| **Sex (male: female)** | 7 : 22 | 4 : 7 | 0.46 |
| **Body weight (kg)** | 24.4 ± 17.3 | 19.4 ± 16.5 | 0.41 |
| **Diameter of dilated common bile duct (cm)** | 2.8 ± 2.2 | 3.7 ± 2.8 | 0.26 |
| **Type of Choledochal cyst (Totani Ia : Ic : IVa)** | 9 : 5 : 15 | 2 : 0 : 9 | 0.24 |
| **History of preoperative cholangitis (n, %)** | 19 (65.5 %) | 7 (63.6 %) | 1.00 |

***BE* bile exposure**
